# Supplementary material for: Electrogenerated chemiluminescence detection of trace level pentachlorophenol using carbon quantum dots
Source: Royal Society of Chemistry journal article supplement (doi:10.1039/c3an36653g), 2013-01-01
Supplement: c3an36653g.pdf [file c3an36653g.pdf]

## Supplementary Information

### S-1. Experimental section

TCHQ, the product of PCP, was analysed by GC-MS in a selected ion monitoring (SIM) mode with a Thermo-Finnigan Trace GC, Polaris Q GC/MS equipped with a DB-5 (30 m×0.25 m i.d., 0.11 µm film thickness) fused silica capillary column. The temperatures of the injector, interface and ion source were 270, 260 and 200° C, respectively. Helium was used as the carrier gas at a flow rate of 1.0 mL/min in constant flow mode. Samples were introduced in splitless mode and the oven temperature was set initially at 80° C (holding time 3 min) and programmed to rise to 260° C at 5° C/min (holding time 10 min). The mass range scanned was 40 – 500 u.

In the SIM mode, three characteristic ions (246, 248, 250) for TCHQ were used for peak identification.

The products of PCP in saline solution were extracted with 1 ml dichloromethane for three times. The combined dichloromethane extract (3 ml) was then concentrated to 0.1 ml, and used for GC-SIM-MS analysis.

## S-2. Figures

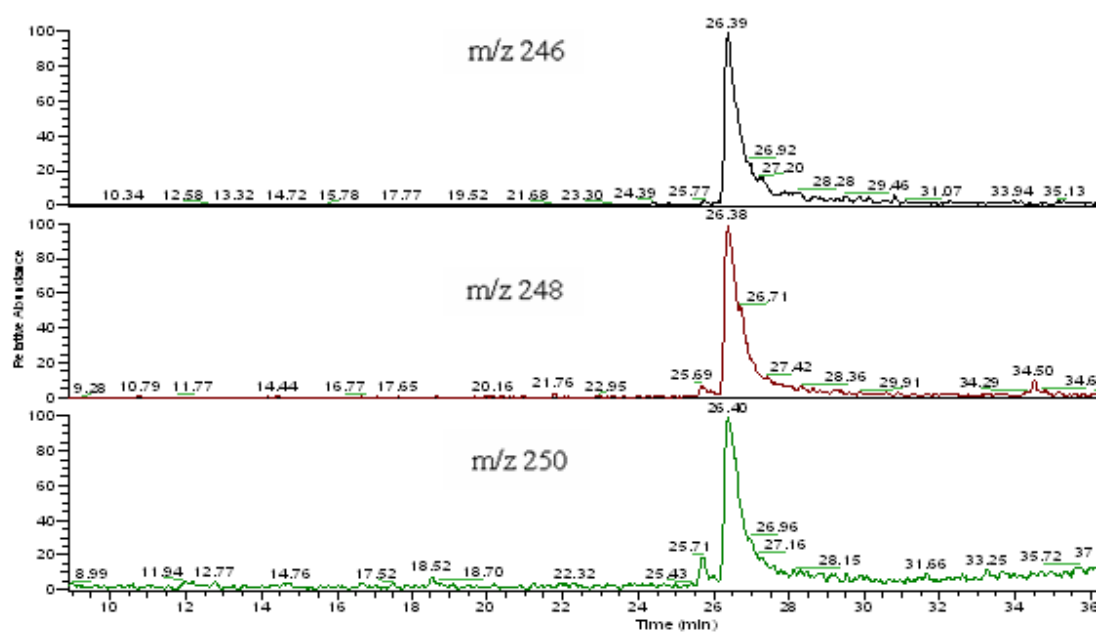

**Figure S1** GC-SIM-MS spectra acquired for TCHQ.
